# Supplementary material
Source: publisher site journal article supplement (https://www.dovepress.com/article/165201)
Supplement: Supplementary file 1 [file get_supplementary_file.php]

## Three-photon imaging using defect-induced photoluminescence in biocompatible ZnO nanoparticles

Achyut J. Raghavendra<sup>1</sup>, Wren E. Gregory<sup>1</sup>, Tyler Slonecki<sup>2</sup>, Yongchang Dong<sup>1</sup>, Indushekhar Persaud<sup>3</sup>, Jared M. Brown<sup>3</sup>, Terri F. Bruce<sup>2</sup>, Ramakrishna Podila<sup>1,4</sup>

<sup>1</sup>Laboratory of Nano-Biophysics, Department of Physics and Astronomy, Clemson Nanomaterials Institute, Clemson University, Clemson, 29634 SC

<sup>2</sup>Clemson Light Imaging Facility, Clemson University, Clemson, SC 29634

<sup>3</sup>Department of Pharmaceutical Sciences, Skaggs School of Pharmacy and Pharmaceutical Sciences, University of Colorado-Anschutz Medical Campus, Aurora, CO 80045

<sup>4</sup>Clemson University School of Health Research and COMSET, Clemson University, Clemson, SC 29634

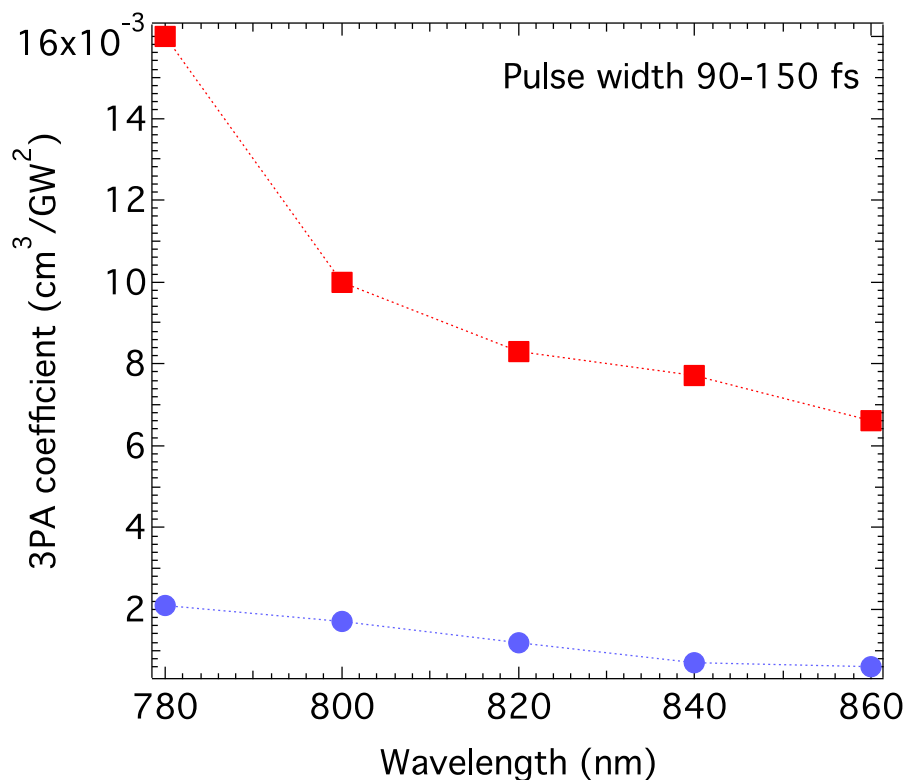

**Fig. S1** Three-photon absorption coefficients for ZnO (red squares) and ZnS (blue dots) NPs measured using ultra-fast fs Z-scan measurements (J. He et al., OPTICS EXPRESS vol. 13, 23, 9235).

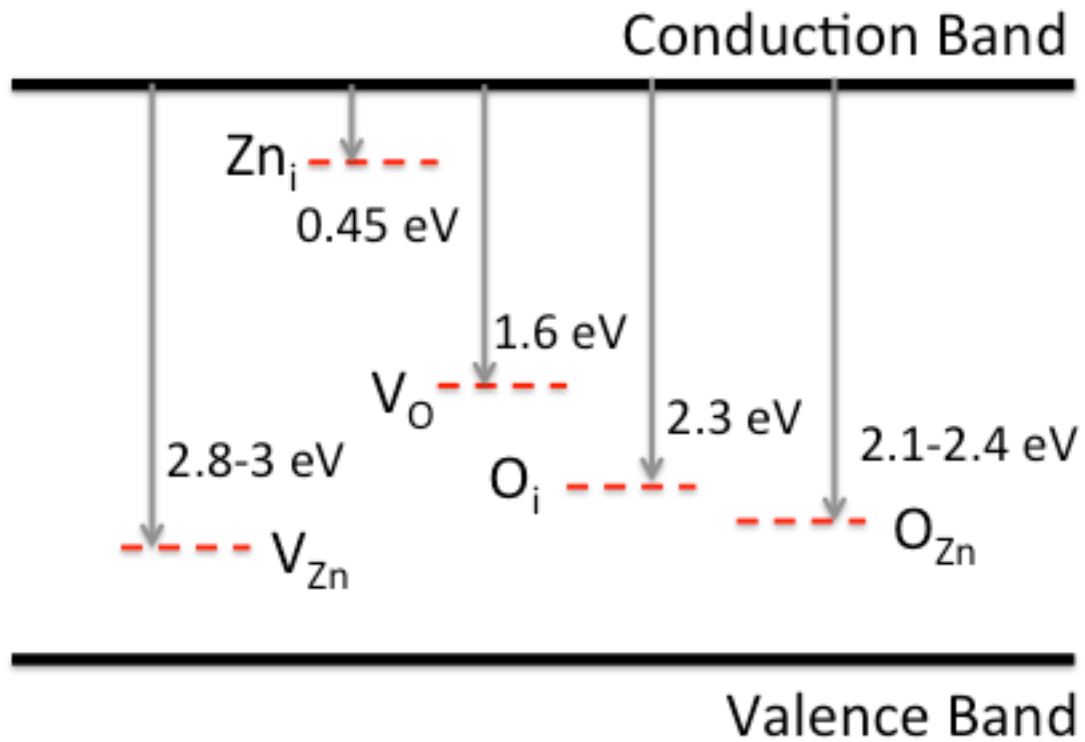

**Fig. S2** Defect-induced electronic states within the band gap of ZnO NPs (B. Lin *et al.* J. Electrochem. Soc. 2001 vol. 148 no. 3 G110-G113)

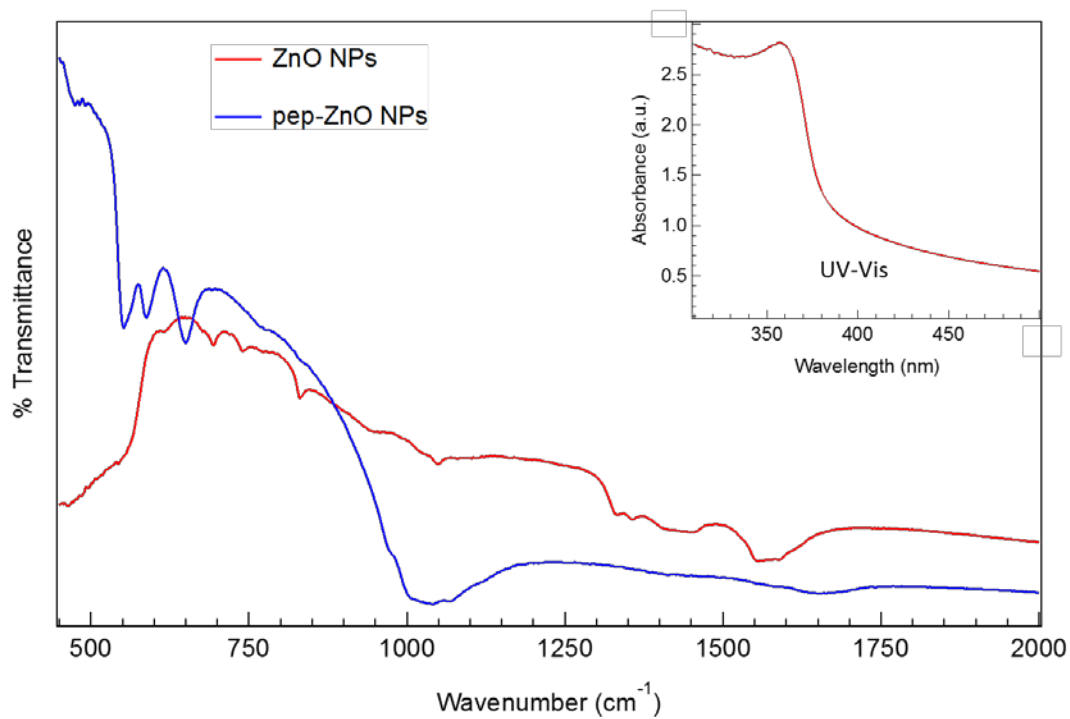

**Fig. S3** FTIR spectra of pep-ZnO NPs show stronger signatures of C-O stretch ( $\sim 1000 \text{ cm}^{-1}$ ), carboxyl ( $\sim 1600 \text{ cm}^{-1}$ ) unlike pristine ZnO. Inset shows UV-Vis spectrum of bare ZnO NPs showing absorbance peak around 360 nm corresponding to the band edge  $\sim 3.4 \text{ eV}$ .

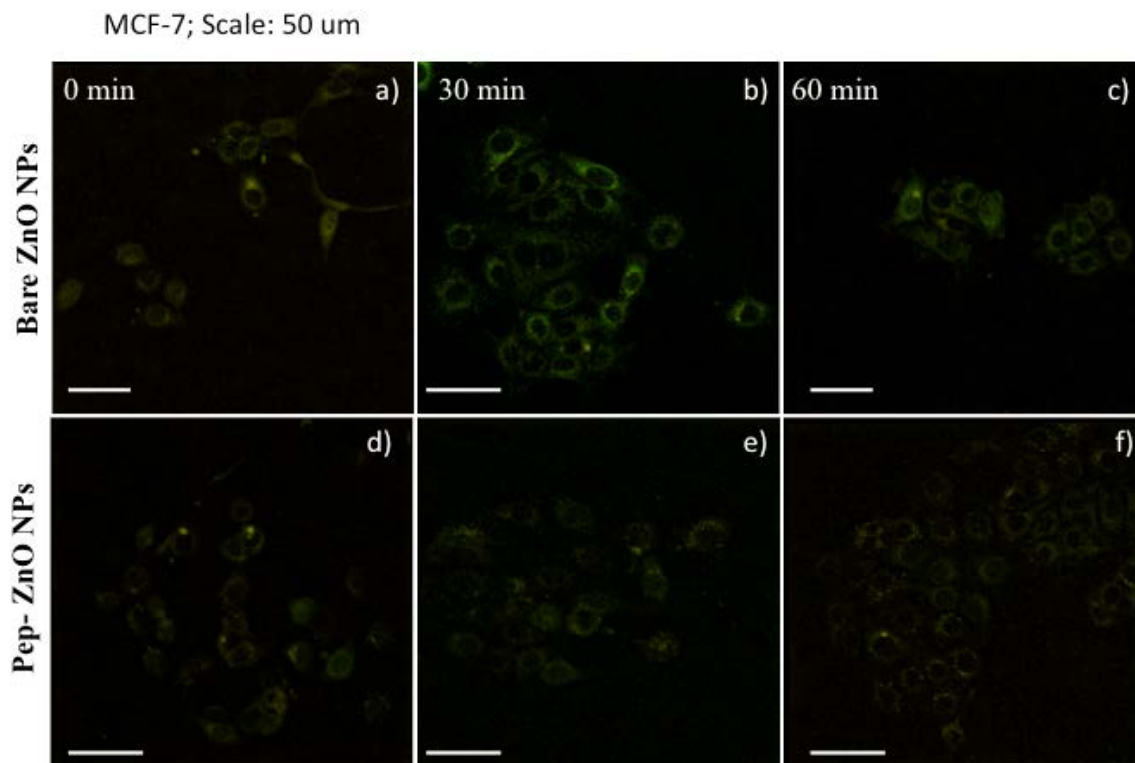

**Fig. S4** Three-photon images for integrin-negative MCF-7 cells at different incubation times with (a-c) bare ZnO NPs and (d-f) pep-ZnO NPs showed no difference in uptake before and after functionalization due to the absence of integrin receptors.

U87MG; Scale: 50  $\mu$ m

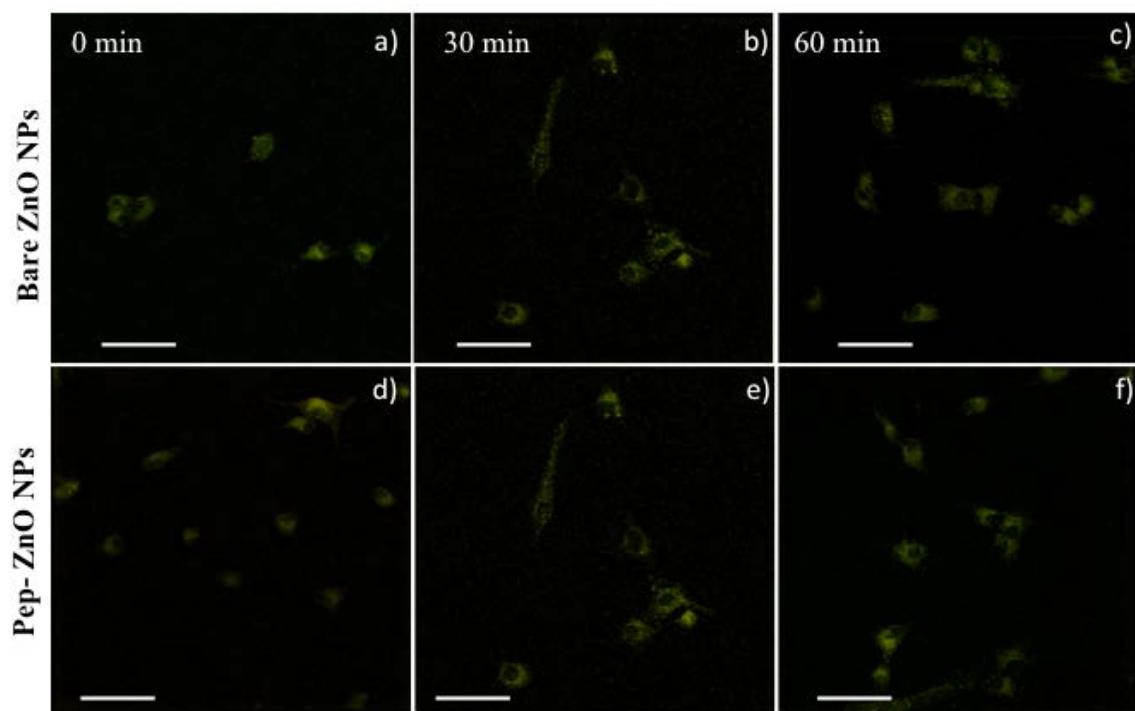

**Fig. S5** Three-photon images for U87MG cells at different incubation times with (a-c) bare ZnO NPs and (d-f) pep-ZnO NPs showed increased uptake after functionalization at 60 mins due to selective binding of RGD pep-ZnO NPs with integrin receptors.

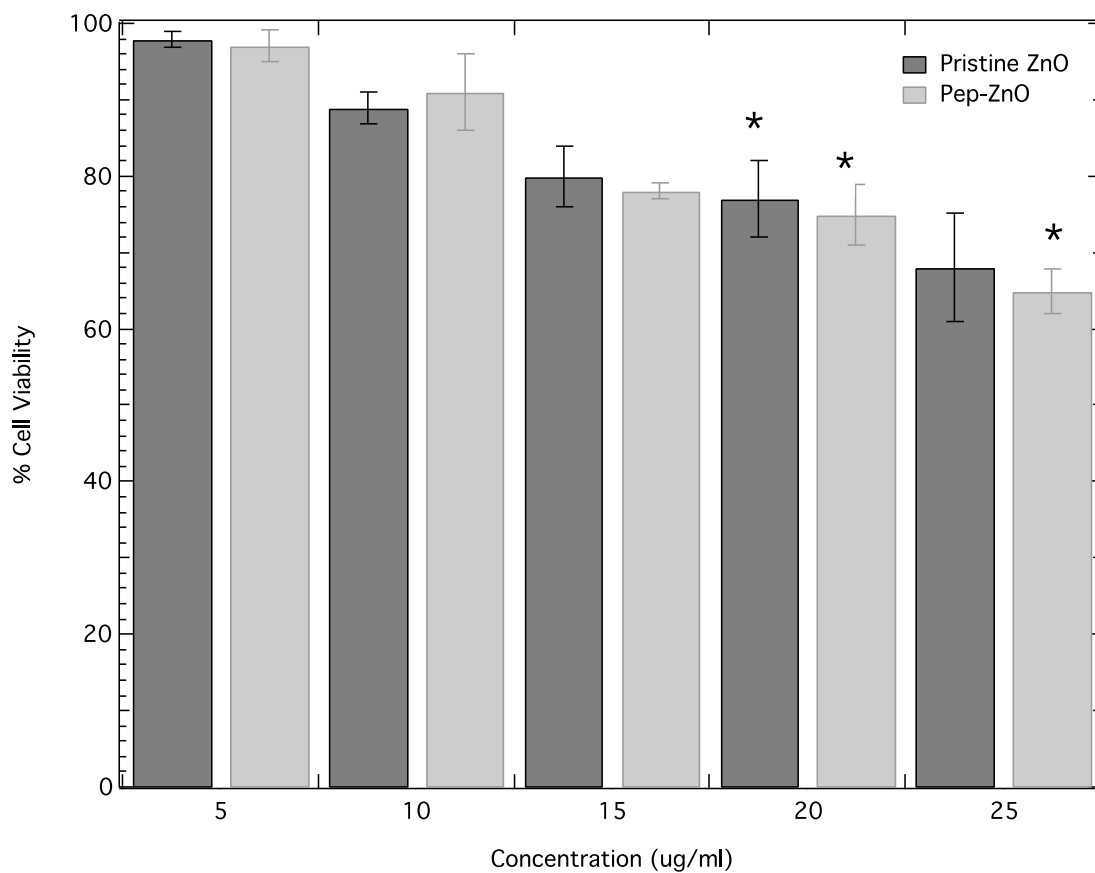

**Fig. S6** RAEC Cell viability analyzed after 24 hrs with MTS assay kit showed no significant change in number of viable cells with ZnO NPs and pep-ZnO NPs up to 20 ug/ml concentrations that are relevant to imaging experiments performed in this study.

| <b>Multiphoton Imaging of ZnO NPs in cells – Imaging Parameters</b>         |
|-----------------------------------------------------------------------------|
| Objective Used: Leica HC PL APO CS2 40x/1.10 water                          |
| Frame Average: 4                                                            |
| Line Average: 4                                                             |
| <b>Laser Settings</b>                                                       |
| Wavelength: 975 nm (Intensity – 14.3%; Gain – 42.9%; Offset – 33.13%)       |
| Detector 1: HyD6 APD1; HyD standard mode; Gain – 123.7; Pseudocolor = green |
| Detector 2: HyD7 APD2; HyD standard mode; Gain – 123.7; Pseudocolor = red   |
| Argon Laser Settings: 488 nm (Intensity – 22.517%)                          |
| PMT Trans Detector: Gain – 254; Offset – 0                                  |
| Laser peak power for all images: 905-911 W                                  |
| Pulse duration: 75-100 fs                                                   |
| Pulse repetition rate: 80 MHz                                               |
| Average laser power for all images: 5.1-5.5 mW                              |
| Average laser power at the sample: 0.5-1 mW                                 |

**Table S1** Laser settings and powers used for obtaining three-photon images.
